# Supplementary material for: A Redox-Responsive Dihydroartemisinin Dimeric Nanoprodrug For Enhanced Antitumor Activity
Source: Research Square preprint supplement (doi:10.21203/rs.3.rs-981484/v1), 2021-10-22
Supplement: Supplementary file 1 [file 20d9eb15b7a52102b23e3b37.docx]

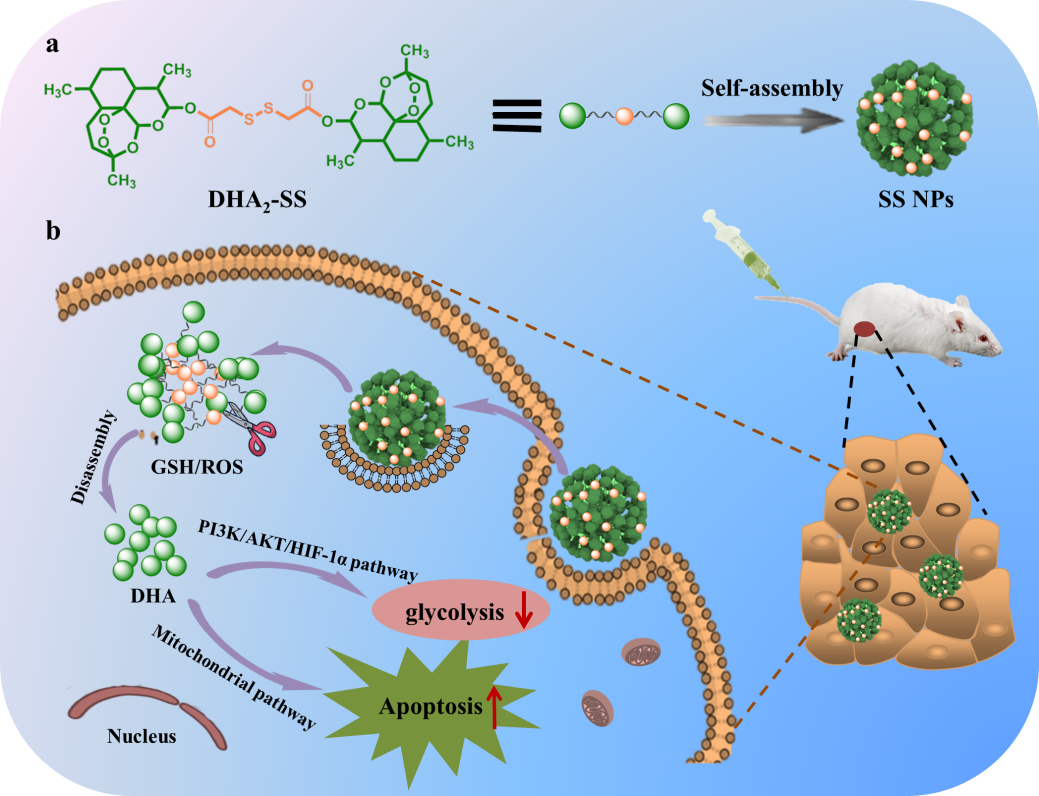


**Scheme 1** Schematic illustration of (a) the construction of disulfide bond linker-bridged dihydroartemisinin dimeric prodrug nanoparticles (SS NPs) and (b) their application for antitumor therapy.
